# Supplementary material
Source: PubMed Central journal article supplement (PMC7034186)
Supplement: DB190514SupplementaryData.pdf [file DB190514SupplementaryData.pdf]

## SUPPLEMENTARY DATA

### **Details of Complication Ascertainment in the Epidemiology of Diabetes Complications (EDC) Study**

Participants were followed for 25 years to ascertain incidence of complications, including proliferative diabetic retinopathy (PDR), microalbuminuria (MA), overt nephropathy (ON), end-stage renal disease (ESRD), coronary artery disease (CAD), and confirmed distal symmetric polyneuropathy (CDSP). The assessment of PDR has been described in detail elsewhere (Klein, 1986). Stereoscopic color fundus photographs of three standard fields (1, 2, and 4) with a Zeiss camera (Carl Zeiss, Oberkochen, Germany), taken after pupil dilation. Photos were graded using a modification of the Early Treatment Diabetic Retinopathy Study (ETDRS) adaptation of the modified Airlie House classification of PDR (ETDRS Reports 10 and 12, 1991). Grading of stereoscopic fundus photographs was performed at the Fundus Photograph Reading Center at the University of Wisconsin-Madison. PDR was defined as ETDRS score  $\geq 60$  or laser photocoagulation for PDR.

Urinary albumin was measured by immunonephelometry (Ellis, 1977). Albumin excretion rate (AER) was calculated for each of three timed urine samples (24-hour, overnight, and 4-hour collections obtained over a two-week period). MA was defined as albumin excretion rate (AER)  $>20 \mu\text{g}/\text{min}$  in 2 of 3 timed urine samples, renal failure, or renal transplantation and ON was defined as AER  $>200 \mu\text{g}/\text{min}$  in 2 of 3 timed urine samples, renal failure, or renal transplantation. ESRD was ascertained by self-report of dialysis or renal transplantation.

CAD was defined as the first instance of CVD death, nonfatal myocardial infarction (MI, including clinical events and subclinical myocardial infarction on ECG, i.e. Minnesota code 1.1 or 1.2), coronary revascularization procedure, blockage  $\geq 50\%$ , ischemic ECG at EDC study visit (Minnesota codes 1.3, 4.1-4.3, 5.1-5.3, 7.1), or EDC physician-diagnosed angina. Fatal events were ascertained using medical records, death certificates, autopsy reports, and/or interview with next of kin and classified according to the Diabetes Epidemiology Research International (DERI) system (DERI Mortality Study Group, 1991). Nonfatal MI, stroke, coronary revascularization, and blockage were confirmed with medical records.

CDSP was defined as experiencing at least two out of three of the following: symptoms consistent with distal symmetric polyneuropathy; sensory and/or motor signs; and absent/reduced tendon reflexes based on the Diabetes Control and Complications Trial clinical examination protocol (Feldman, 1994), in addition to an abnormal age-specific vibratory threshold using the Vibratron II Tester (Physitemp Instruments, Clifton, NJ, USA).

#### References:

Diabetes Epidemiology Research International Mortality Study Group. Major cross-country differences in risk of dying for people with IDDM. *Diabetes Care*. 1991; 14(1): 49-54.

Ellis D, Buffone GJ. New approach to evaluation of proteinuric states. *Clin Chem*. 1977;23(4):666-70.

Grading diabetic retinopathy from stereoscopic color fundus photographs--an extension of the modified Airlie House classification. ETDRS report number 10. Early Treatment Diabetic Retinopathy Study Research Group. *Ophthalmology*. 1991;98(5 Suppl):786-806.

Fundus photographic risk factors for progression of diabetic retinopathy. ETDRS report number 12. Early Treatment Diabetic Retinopathy Study Research Group. *Ophthalmology*. 1991;98(5 Suppl):823-33.

Feldman EL, Stevens MJ, Thomas PK, Brown MB, Canal N, Greene DA. A practical two-step quantitative clinical and electrophysiological assessment for the diagnosis and staging of diabetic neuropathy. *Diabetes Care*. 1994;17(11):1281-9.

Klein R, Klein BE, Magli YL, Brothers RJ, Meuer SM, Moss SE, et al. An alternative method of grading diabetic retinopathy. *Ophthalmology*. 1986;93(9):1183-7.

## SUPPLEMENTARY DATA

### **Weibull Regression: Additional Details**

To determine whether the published cumulative incidences of proliferative retinopathy, overt nephropathy, and cardiovascular disease in DCCT/EDIC differ from what would be expected based on A1c Months exposure, we estimated the cumulative incidence of each complication across the range of A1c months using Weibull regression within the DCCT-comparable subgroup of the EDC cohort. The Weibull distribution is a commonly used distribution for parametric modeling of survival data. In our models, A1c months was used as the time scale, rather than diabetes duration or follow-up time. The Weibull distribution has the property that the log-log of survival is linear with the log of time. Thus, we confirmed that this assumption held for each complication by plotting log-log survival curves against log (A1c Months) using PROC LIFETEST in SAS 9.4 (SAS Institute Inc., Cary, NC). Weibull accelerated failure time models were then fit for each complication, with A1c Months as the time scale, using PROC LIFEREG (SAS 9.4, SAS Institute Inc., Cary, NC). Using the regression coefficients, the estimated cumulative incidence of each complication was calculated at 534 and 729 A1c Months (the means observed in the DCCT/EDIC Intensive and Conventional treatment arms, respectively, at EDIC Year 8) and compared to the published cumulative incidences at 20 years' diabetes duration in DCCT/EDIC (DCCT/EDIC Research Group, 2009). As the published DCCT/EDIC results were based on unadjusted models, we have also not adjusted for covariates in the current analyses.

#### Reference:

Diabetes Control and Complications Trial/Epidemiology of Diabetes Interventions and Complications (DCCT/EDIC) Research Group. Modern-day clinical course of type 1 diabetes mellitus after 30 years' duration. *Arch Intern Med.* 2009; 169(14): 1307-16.

## SUPPLEMENTARY DATA

Supplementary Figure 1. Example A1c months calculations in three EDC participants from the 1965-1980 diagnosis cohort

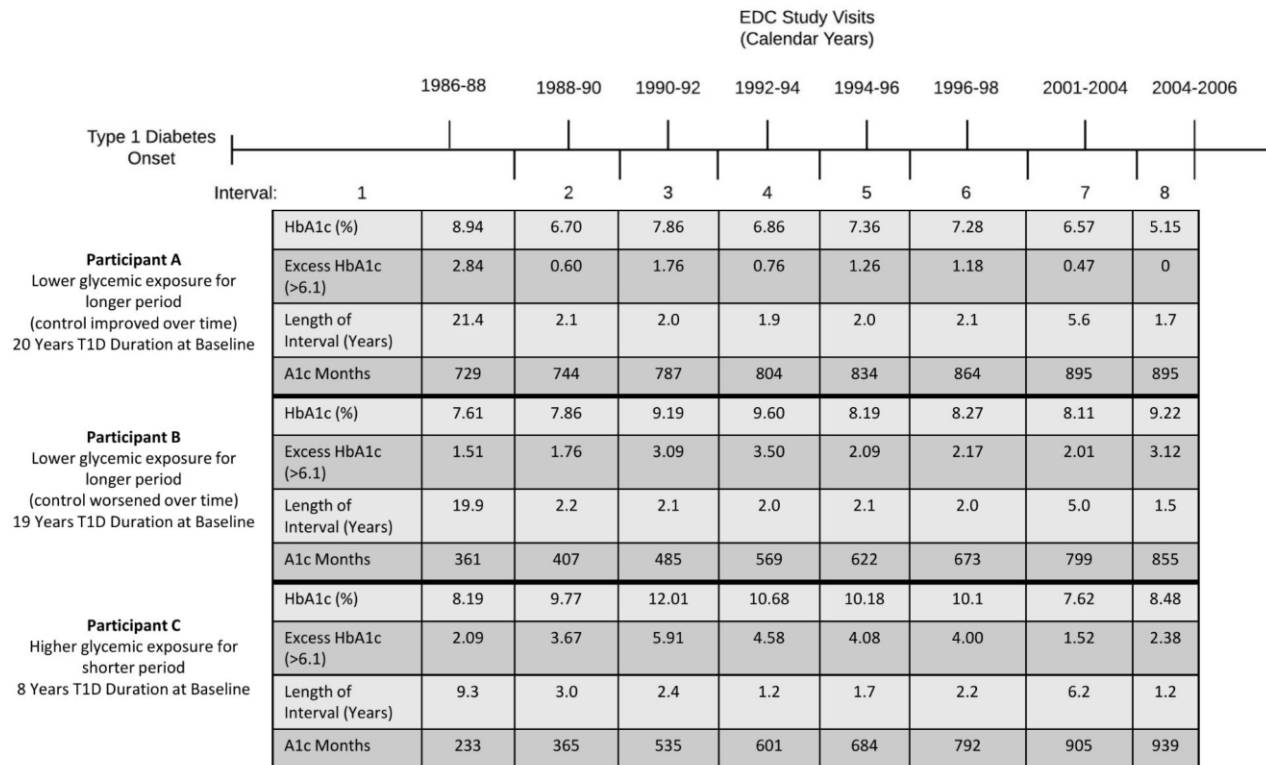

SUPPLEMENTARY DATA

Supplementary Figure 2. Distribution of A1c Months at proliferative retinopathy incidence

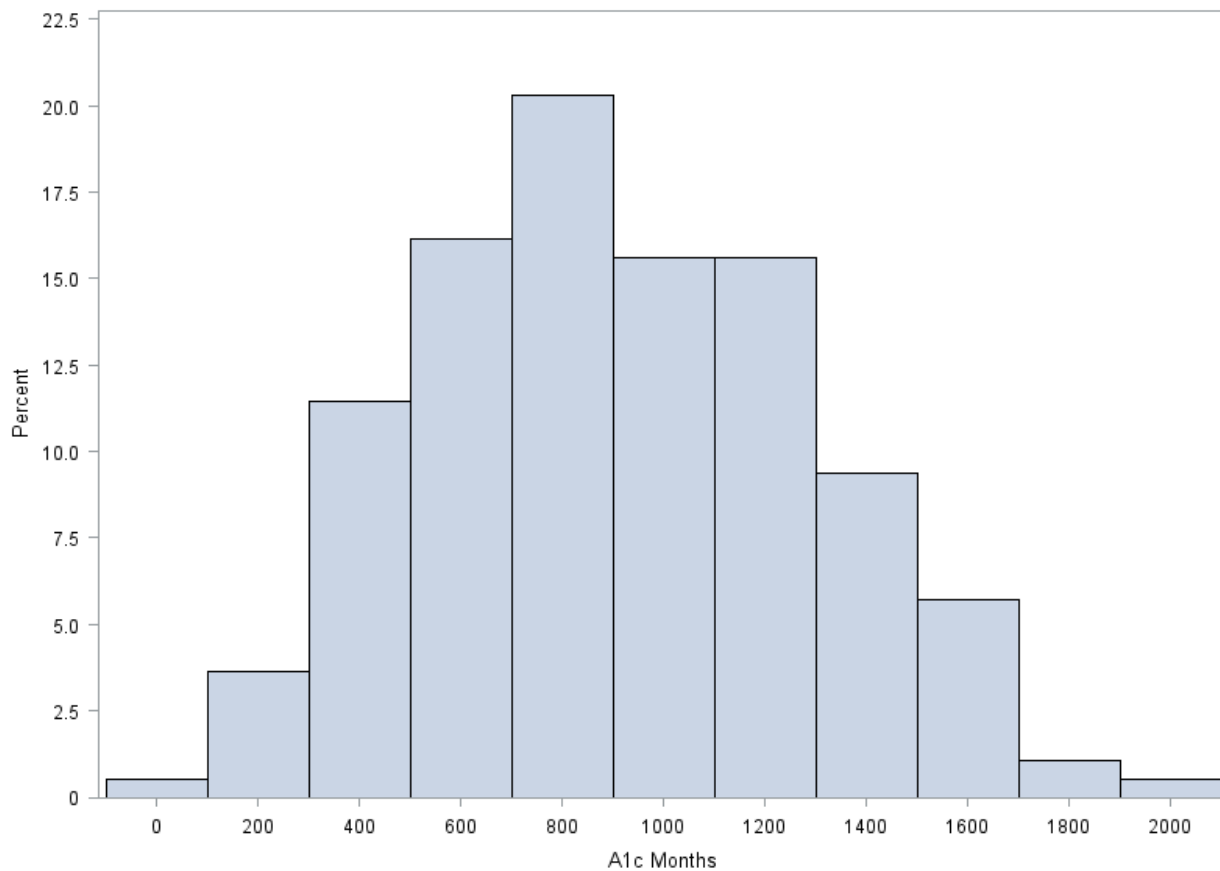

## SUPPLEMENTARY DATA

Supplementary Table 1. Time to 900 A1c Months by Degree of HbA1c Excess

| <b>Excess HbA1c</b> | <b>Time</b> |
|---------------------|-------------|
| 1% above normal     | 75 years    |
| 2% above normal     | 38 years    |
| 3% above normal     | 25 years    |
| 4% above normal     | 19 years    |
| 5% above normal     | 15 years    |
